# Supplementary material for: Klotho Alleviates Lung Injury Caused by Paraquat via Suppressing ROS/P38 MAPK-Regulated Inflammatory Responses and Apoptosis
Source: Hindawi journal article supplement (doi:10.1155/2020/1854206), 2020-05-14
Supplement: f1 [file 1854206.f1.pdf]

## Supplementary Materials

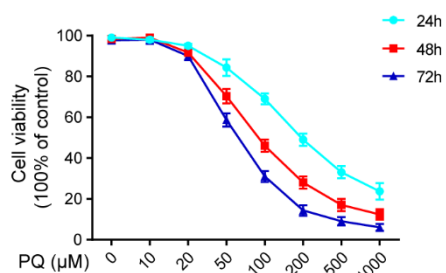

**Fig. S1 PQ treatment decreased the A549 cell viability in a dose- and time-dependent manner.** A549 cells were incubated with PQ at a concentration range up to 1000  $\mu\text{M}$  for 24, 48, and 72 h, then cell viability was determined by the WST-8 assay.

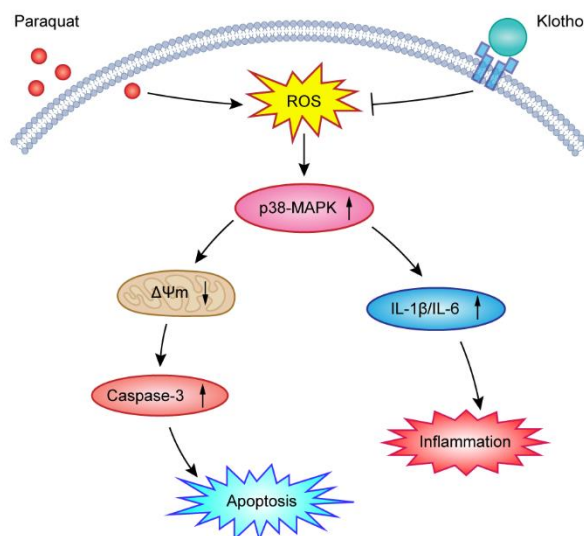

**Fig. S2 Schematic illustration.** Schematic illustration showing klotho alleviates paraquat-induced lung injury through inhibiting ROS/P38 MAPK signaling-regulated inflammatory responses and mitochondrial apoptosis.

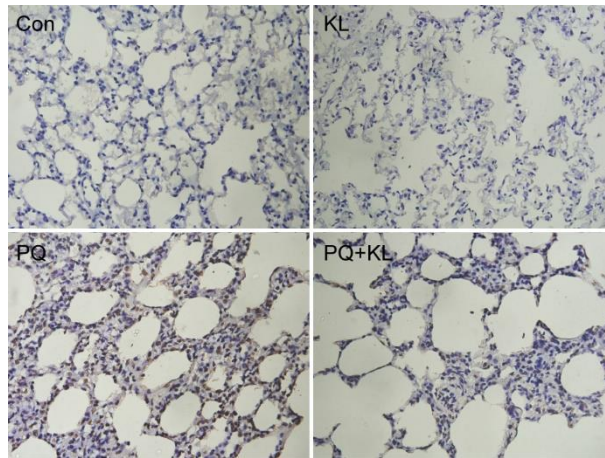

**Fig. S3** Effects of KL administration on PQ-induced apoptosis of lung cells. The representative images of apoptosis in situ. Apoptosis was measured using TUNEL assay. **Fig. S3** Effects of KL administration on PQ-induced apoptosis of lung cells. The representative images of apoptosis in situ. Apoptosis was measured using TUNEL assay.
